P4372

# Left atrial strain: a potential marker of early diastolic dysfunction in patients with Marfan syndrome

E. Garcia-Izquierdo Jaen, S. Mingo Santos, M. Torres Sanabria, V. Monivas Palomero, S. Moreno Casado, S. Navarro Rico, C.E. Martin Lopez, D. Martinez Lopez, C. Mitroi, J. Gonzalez Mirelis, M.A. Caverio Gibanel, A. Forteza Gil

University Hospital Puerta de Hierro Majadahonda, Madrid, Spain

On behalf of AORTASANA-CM

**Funding Acknowledgement:** Programa de Actividades de I+D de la Comunidad de Madrid

**Background/Introduction:** Previous studies using conventional echocardiographic measurements have reported subclinical left diastolic dysfunction in patients with Marfan syndrome (MFS). Left atrial strain (LAS) has been shown to be an accurate predictor of left ventricular diastolic dysfunction. However, there is no evidence regarding the use of LAS in MFS. **Purpose:** To assess feasibility of LAS and compare LAS derived measurements along with traditional diastolic parameters in MFS patients vs healthy controls.

**Methods:** 46 MFS patients (normal LV ejection fraction, no previous cardiovascular surgery, no significant valvular regurgitation) vs. 20 healthy controls (age and sex-matched). We performed LAS analysis using 2D speckle-tracking (QLAB 10, Philips). LA strain was determined as the average value of the longitudinal deformation (7 segments) in the apical 4-chamber view (RR gating).

**Results:** LAS analysis was feasible in 40 MFS patients (87%). All participants had normal diastolic function according to current guidelines (ASE/EACVI 2016). MFS patients showed lower TDI e' velocities and higher average E/e' ratio, but still within normal range. Similarly, LVEF was normal but slightly reduced in MFS patients. LA strain and strain rate parameters during reservoir and conduit phase were significantly impaired in MFS patients compared to controls.

**Conclusion:** MFS patients showed a subtle impairment in diastolic function compared to controls. Although further evidence is needed, LAS derived parameters could be early markers of diastolic dysfunction in this group of patients.

## MFS vs controls

|                   | MFS patients (n=40) | Controls (n=20) | p      |                           | MFS patients (n=40) | Controls (n=20) | p      |
|-------------------|---------------------|-----------------|--------|---------------------------|---------------------|-----------------|--------|
| Age               | 33.8±12.4           | 34.4±8.3        | 0.846  | Septal e' (cm/s)          | 9.7±2.5             | 11.7±2.3        | 0.006  |
| Male (%)          | 24 (60%)            | 12 (60%)        | 1.000  | Average E/e' ratio        | 6.8±1.5             | 5.5±1.1         | 0.002  |
| SBP (mmHg)        | 120.3±12.4          | 120.1±9.4       | 0.969  | TR velocity (cm/s)        | 208.6±21.4          | 201.6±22.9      | 0.390  |
| DBP (mmHg)        | 72.0±10.1           | 67.1±6.2        | 0.069  | LAVi (ml/m <sup>2</sup> ) | 23.5±7.1            | 25.5±4.8        | 0.260  |
| Aortic root (mm)  | 40.3±4.6            | 31.7±3.7        | <0.001 | LASr (%)                  | 32.6±8.8            | 43.0±8.3        | <0.001 |
| LVEF (%)          | 60.9±5.6            | 64.2±4.2        | 0.022  | LAScd (%)                 | -20.1±8.0           | -29.4±5.5       | <0.001 |
| E-wave (cm/s)     | 74.6±16.5           | 76.7±16.5       | 0.651  | LASct (%)                 | -12.8±6.1           | -13.6±5.2       | 0.622  |
| A-wave (cm/s)     | 55.2±10.9           | 52.0±12.8       | 0.327  | LASRr                     | 2.02±0.49           | 2.31±0.43       | 0.030  |
| E/A ratio         | 1.4±0.4             | 1.5±0.4         | 0.287  | LASRcd                    | -2.22±0.61          | -3.07±0.68      | <0.001 |
| Lateral e' (cm/s) | 13.0±3.6            | 16.3±3.3        | 0.002  | LASRct                    | -2.24±0.90          | -2.35±0.75      | 0.600  |

SBP: Systolic blood pressure. DBP: Diastolic blood pressure. LVEF: Left ventricular ejection fraction. LAVi: Left atrial volume index. LAS: Left atrial strain. LASR: Left atrial strain rate. (r): Reservoir. (cd): Conduit. (ct): Contraction.

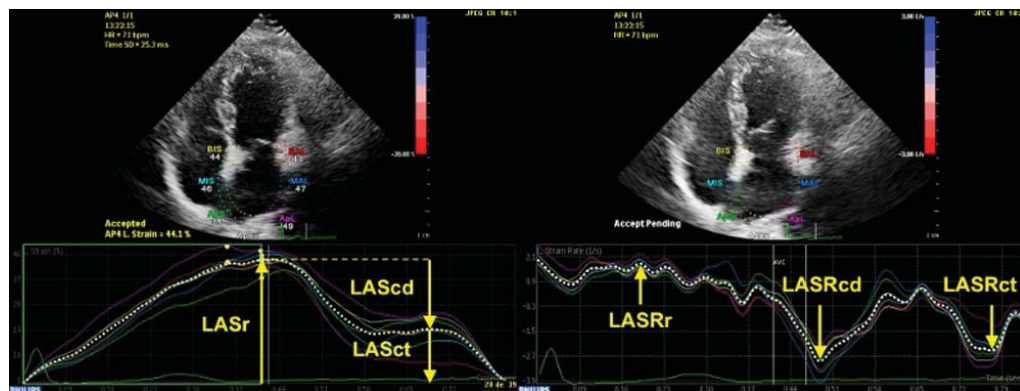

Example of LA strain and strain rate
